# Supplementary material for: Frequency Dependence of Signal Power and Spatial Reach of the Local Field Potential
Source: PLOS journal article supplement (doi:10.1371/journal.pcbi.1003137), 2013-07-18
Supplement: S11 (10.1371/journal.pcbi.1003137.s011) [file journal.pcbi.1003137.s011]

| D                                                                                                                                                                 |                                                                                                                                                                                                                                                                                                                                         | Synapse           |             |                   |
|-------------------------------------------------------------------------------------------------------------------------------------------------------------------|-----------------------------------------------------------------------------------------------------------------------------------------------------------------------------------------------------------------------------------------------------------------------------------------------------------------------------------------|-------------------|-------------|-------------------|
| Type                                                                                                                                                              | current synapse with $\alpha$ -function shaped postsynaptic currents (PSCs)                                                                                                                                                                                                                                                             |                   |             |                   |
| Dynamics                                                                                                                                                          | input current: $I(t) = \sum_i h(t - t_i)$<br>with kernel $h(t) = I_0 \frac{t}{\tau} e^{1-(t-t_i)/\tau} \theta(t - t_i)$<br>where $t_i$ is the arrival time of presynaptic spike $i$ , $\theta$ is Heaviside step function, with time constant $\tau$ and amplitude $I_0 = I_e, I_i$ for excitatory and inhibitory synapses respectively |                   |             |                   |
| Parameters                                                                                                                                                        | $\tau, I_e, I_i$                                                                                                                                                                                                                                                                                                                        |                   |             |                   |
| E                                                                                                                                                                 |                                                                                                                                                                                                                                                                                                                                         | Input             |             |                   |
| Poissonian input                                                                                                                                                  |                                                                                                                                                                                                                                                                                                                                         |                   |             |                   |
| Uncorrelated input                                                                                                                                                | each cell receives $n_{syn}$ independent excitatory inputs generated by Poissonian point processes with rate $r_{syn}$                                                                                                                                                                                                                  |                   |             |                   |
| Correlated input                                                                                                                                                  | each cell receives $n_{syn}$ excitatory inputs drawn (without resampling) from a finite-sized pool (size $n_{pool}$ ) of independent Poissonian point processes with rate $r_{syn}$ resulting in correlation $c_{in} = n_{syn}/n_{pool}$ between total input current of different cells                                                 |                   |             |                   |
| Synapse placement                                                                                                                                                 | synapses placed on dendrites in certain layers depending on synaptic input region (apical/homogeneous/basal) and cell type:                                                                                                                                                                                                             |                   |             |                   |
|                                                                                                                                                                   | cell type                                                                                                                                                                                                                                                                                                                               | apical            | homogeneous | basal             |
|                                                                                                                                                                   | L3                                                                                                                                                                                                                                                                                                                                      | upper half of L23 | L1 and L23  | lower half of L23 |
|                                                                                                                                                                   | L4                                                                                                                                                                                                                                                                                                                                      | -                 | L4          | -                 |
|                                                                                                                                                                   | L5                                                                                                                                                                                                                                                                                                                                      | L1 and L23        | all layers  | L5 and L6         |
| Random placement of synapses within allowed boundaries with uniform density with respect to membrane area (note: $n_{syn}$ is fixed irrespective of input region) |                                                                                                                                                                                                                                                                                                                                         |                   |             |                   |
| Parameters                                                                                                                                                        | $n_{syn}, r_{syn}, c_{in}$                                                                                                                                                                                                                                                                                                              |                   |             |                   |
| F                                                                                                                                                                 |                                                                                                                                                                                                                                                                                                                                         | Measurements      |             |                   |
| Simulated LFP                                                                                                                                                     |                                                                                                                                                                                                                                                                                                                                         |                   |             |                   |
| Type                                                                                                                                                              | extracellular field potentials (representing the LFP) calculated using the line-source method                                                                                                                                                                                                                                           |                   |             |                   |
| Assumptions                                                                                                                                                       | extracellular medium as assumed to be purely resistive (non-capacitive) and infinitely-volumed with extracellular conductivity $\sigma_{cond}$                                                                                                                                                                                          |                   |             |                   |
| Electrode properties                                                                                                                                              | ideal (non-filtering) point electrode placed either in the center ( $r=0$ ) of the cylindrical geometry, or offset by some distance; at depths corresponding to the middle of each layer (see Table S1:Population).                                                                                                                     |                   |             |                   |
| Parameters                                                                                                                                                        | $\sigma_{cond}$                                                                                                                                                                                                                                                                                                                         |                   |             |                   |
