# Supplementary material for: Frequency Dependence of Signal Power and Spatial Reach of the Local Field Potential
Source: PLOS journal article supplement (doi:10.1371/journal.pcbi.1003137), 2013-07-18
Supplement: S12 (10.1371/journal.pcbi.1003137.s012) [file journal.pcbi.1003137.s012]

| A                          |  |                                                                                                                                                                                       |                |                        | Population                                                                      |                |  |  |  |
|----------------------------|--|---------------------------------------------------------------------------------------------------------------------------------------------------------------------------------------|----------------|------------------------|---------------------------------------------------------------------------------|----------------|--|--|--|
| Name                       |  | Description                                                                                                                                                                           |                |                        | Value                                                                           |                |  |  |  |
| $N$                        |  | number of cells                                                                                                                                                                       |                |                        | 10000                                                                           |                |  |  |  |
| $R$                        |  | population radius                                                                                                                                                                     |                |                        | 1000 $\mu\text{m}$                                                              |                |  |  |  |
| $z_k$ and layer boundaries |  | layer boundaries and soma positions (in units of $\mu\text{m}$ in relation to cortical surface at 0 $\mu\text{m}$ ), derived from Stepanyants et al., Cereb Cortex 2008, 18(1):13–28: |                |                        |                                                                                 |                |  |  |  |
|                            |  | layer                                                                                                                                                                                 | upper boundary | soma depth $z_k$       |                                                                                 | lower boundary |  |  |  |
|                            |  | L1                                                                                                                                                                                    | 0              | -                      |                                                                                 | -81.6          |  |  |  |
|                            |  | L2/3                                                                                                                                                                                  | -81.6          | -334.3                 |                                                                                 | -587.1         |  |  |  |
|                            |  | L4                                                                                                                                                                                    | -587.1         | -754.6                 |                                                                                 | -922.2         |  |  |  |
|                            |  | L5                                                                                                                                                                                    | -922.2         | -1021.1 <sup>(1)</sup> |                                                                                 | -1170.0        |  |  |  |
|                            |  | L6                                                                                                                                                                                    | -1170.0        | -                      |                                                                                 | -1491.7        |  |  |  |
| B                          |  |                                                                                                                                                                                       |                |                        | Neuron                                                                          |                |  |  |  |
| Name                       |  | Description                                                                                                                                                                           |                |                        | Value                                                                           |                |  |  |  |
| $R_m$                      |  | specific membrane resistance                                                                                                                                                          |                |                        | 30 $\text{k}\Omega\cdot\text{cm}^2$                                             |                |  |  |  |
| $R_a$                      |  | specific axial resistance                                                                                                                                                             |                |                        | 150 $\Omega\cdot\text{cm}$                                                      |                |  |  |  |
| $C_m$                      |  | specific membrane capacitance                                                                                                                                                         |                |                        | 1.0 $\mu\text{F}/\text{cm}^2$                                                   |                |  |  |  |
| C                          |  |                                                                                                                                                                                       |                |                        | Synapse                                                                         |                |  |  |  |
| Name                       |  | Description                                                                                                                                                                           |                |                        | Value                                                                           |                |  |  |  |
| $\tau$                     |  | synaptic time constant                                                                                                                                                                |                |                        | 0.1 ms                                                                          |                |  |  |  |
| $I_e$                      |  | excitatory current amplitude                                                                                                                                                          |                |                        | 50 pA                                                                           |                |  |  |  |
| D                          |  |                                                                                                                                                                                       |                |                        | Input                                                                           |                |  |  |  |
| Name                       |  | Description                                                                                                                                                                           |                |                        | Value                                                                           |                |  |  |  |
| $n_{\text{syn}}$           |  | number of synapses                                                                                                                                                                    |                |                        | 1000                                                                            |                |  |  |  |
| $r_{\text{syn}}$           |  | synaptic input rate                                                                                                                                                                   |                |                        | 5 spikes/s                                                                      |                |  |  |  |
| $C_{\text{in}}$            |  | pairwise input correlation between cells                                                                                                                                              |                |                        | {0.01,0.1,1.0}                                                                  |                |  |  |  |
| E                          |  |                                                                                                                                                                                       |                |                        | Measurements                                                                    |                |  |  |  |
| Name                       |  | Description                                                                                                                                                                           |                |                        | Value                                                                           |                |  |  |  |
| $\sigma_{\text{cond}}$     |  | extracellular conductivity                                                                                                                                                            |                |                        | 0.3 S/m                                                                         |                |  |  |  |
| F                          |  |                                                                                                                                                                                       |                |                        | Simulation                                                                      |                |  |  |  |
| Name                       |  | Description                                                                                                                                                                           |                |                        | Value                                                                           |                |  |  |  |
| $\text{dt}_{\text{sim}}$   |  | time resolution in simulation                                                                                                                                                         |                |                        | 1/64 ms                                                                         |                |  |  |  |
| $\text{dt}_{\text{data}}$  |  | time resolution of data                                                                                                                                                               |                |                        | 1.0 ms                                                                          |                |  |  |  |
| T                          |  | simulation time                                                                                                                                                                       |                |                        | either 10200 ms or 1200 ms (off-center or outside of soma layer) <sup>(2)</sup> |                |  |  |  |

<sup>(1)</sup> the somata of the L5 cells were adjusted 25  $\mu\text{m}$  upwards compared to midpoint of L5 so that apical dendrites reach L1

<sup>(2)</sup> the first 200 ms were discarded to avoid upstart effects
